# Supplementary material for: Crop diversity enriches arbuscular mycorrhizal fungal communities in an intensive agricultural landscape
Source: PubMed Central journal article supplement — New Phytol. 2021 Apr 2;231(1):447–59. doi: 10.1111/nph.17306 (PMC9292320; doi:10.1111/nph.17306), 2021-04-02
Supplement: NPH-231-447-s001.pdf [file NPH-231-447-s001.pdf]

1 ***New Phytologist* Supporting Information**

2  
3 **Article title:** Crop diversity enriches AMF communities in an intensive agricultural landscape

4 Authors: Aidee Guzman, Marisol Montes, Leslie Hutchins, Gisel DeLaCerde, Paula Yang, Anne  
5 Kakouridis, Ruth Dahlquist-Willard, Mary Firestone, Timothy Bowles and Claire Kremen

6  
7 **Article acceptance date:** 15 February 2021

8  
9  
10 **The following Supporting Information is available for this article:**

11  
12 **Methods S1** Molecular analysis of AMF communities: primer selection, PCR conditions, and  
13 amplicon library preparation

14  
15 **Fig. S1** PCA of soil properties used to calculate the soil properties index. The ordination plot is  
16 color-coded to illustrate differences in soil properties between farm management (monoculture  
17 versus polyculture) and transect type (within-row versus across-row).

18  
19 **Fig. S2** The frequency of AMF taxa found in as few as 1 to as many as 100 of all 372  
20 communities sampled. Of the 244 AMF OTUs, 167 occurred in fewer than 10 samples.

21  
22 **Fig. S3** The AMF taxa accumulation curve reaching a plateau of  $214.778 \pm 9.546$   
23 of 244 taxa after 167 samples.

24  
25 **Fig. S4** Boxplot for observed richness for (a) between farm management (monoculture versus  
26 polyculture) and transect type (within-row versus across-row) plus (b) focal crop (eggplant  
27 versus squash). The boxplot is bounded by the first and third quartile ranges with the line in the  
28 box representing the median. The whiskers extend from the first and third quartile to values that  
29 are not within the 1.5 interquartile range from both directions. Data beyond the whiskers are  
30 presented as individual circles.

31  
32 **Fig. S5** The boxplot for AMF (a) observed richness, (b) chao1 richness, and (c) diversity across  
33 the number of years in polyculture management (0, <10, and >10 years).

34  
35 **Fig. S6** The boxplot for the dispersion of the edaphic property dissimilarities from the centroid  
36 between farm management (monoculture versus polyculture).

37  
38 **Table S1.** Site-by-site properties, including farm management (monoculture versus polyculture),  
39 focal crop (eggplant versus squash), plus the first year of polyculture management, number of  
40 years in polyculture, monoculture, or fallow.

41

42 **Table S2.** Results of the indicator species analysis for AMF taxa (listed by OTU plus their genus)  
43 of monoculture and polyculture fields.

44

45 **Table S3.** Model parameter estimates, with standard error in parentheses, of all soil properties.

46

47

48

49

50

51

52 **Methods S1** *Molecular analysis of AMF communities: primer selection, PCR conditions, and*  
53 *amplicon library preparation*

54

55 AMF communities in root-zone soil were characterized using molecular methods. Soil  
56 samples for molecular measurements were immediately stored at -80°C upon return to the lab until  
57 DNA extractions could proceed. DNA was extracted from 0.25g of soil using the DNeasy  
58 PowerSoil Kit (Qiagen, location). DNA concentration was measured with the Quant-iT 1X dsDNA  
59 HS Assay kit (Life Technologies Inc., Gaithersburg, MD, USA) and concentrations were adjusted  
60 to 5ng/μl with ddH<sub>2</sub>O prior to PCR amplification. The ITS2 rRNA region (5.8Fun/ITS4Fun) was  
61 amplified to characterize the communities of fungi. Apart from providing more accurate measures  
62 of fungal diversity and abundance (Taylor *et al.*, 2016), since our root-zone samples could contain  
63 roots, despite best efforts to remove them, ITS2 primers were also used because they can better  
64 discriminate against plant DNA than other ITS primers (Taylor *et al.*, 2016). ITS2 primers have  
65 also matched well with all lineages in Glomeromycotina, the subphylum AMF belong to,  
66 (Spatafora *et al.*, 2016). Further, in the same study region, they have successfully been used to  
67 study fine-scale patterns of AMF community succession (Gao *et al.*, 2019). In addition, we also  
68 considered the differences in characterizing AMF communities using primers in the more variable  
69 ITS2 region versus AMF specific primers (i.e. NS31/AML2 primers; Simon *et al.*, 1992; Lee *et*  
70 *al.*, 2008) in the more well-conserved small subunit (SSU) rRNA region. First, ITS2 primers have  
71 been shown to detect similar environmental patterns to AMF-specific SSU primers (Berruti *et al.*  
72 2017; Lekberg *et al.* 2018). However, while AMF specific primers are considered to resolve more  
73 “species-level” assignments of AMF taxa, the well-conserved SSU region may not be able to  
74 discriminate between taxon groups within some AMF families, namely in the Diversisporaceae  
75 and Glomeraceae, and, thus, potentially may lump several distinct AMF taxa from these families  
76 into single taxonomic units (Stockinger *et al.* 2012; Öpik *et al.*, 2013). In contrast, the more  
77 variable ITS2 region primers provide better separation between inter- and intra-species variation  
78 among fungi than the AMF-specific SSU primers (Schoch *et al.*, 2012). Therefore, while the ITS2  
79 primers can potentially result in a larger number of unassigned AMF taxa at lower hierarchical  
80 levels, these primers could reduce lumping distinct AMF taxa into the same taxon. Since the main  
81 objective of our study was to examine how farm management impacted AMF community richness  
82 and diversity, we used the more variable ITS2 primers to characterize the AMF community in our  
83 soil samples to avoid potentially obscuring AMF community inter-species variation. The (5.8S)  
84 forward and (ITS4) reverse primers contained a 29 (forward) or 25 (reverse) base linker, a 12 base  
85 barcode, a 29 (forward) or 34 (reverse) base pad, a 0–8 base heterogeneity spacer (Fadrosh *et al.*,  
86 2014). Sequencing of amplicon libraries was performed on the Illumina MiSeq platform (Illumina,  
87 San Diego, CA, USA) with 300bp paired-end reads at the Vincent J. Coates Genomics Sequencing  
88 Laboratory at the University of California, Berkeley, CA. Detailed information about molecular  
89 analysis, specifically PCR conditions and amplicon library preparation, can be found in the  
90 supplementary methods.

91

92 PCR amplification for each sample was carried out in a 25 µl reaction mixture containing:  
93 10µl 5PRIME HotMaster Mix (Eppendorf-5Prime, Gaithersburg, MD, USA), 2.5µl forward  
94 primer, 2.5µl reverse primer, 2µl template DNA, 3µl BSA, and 5µl nuclease-free water. PCR  
95 amplification was performed using the one-step PCR method in the Gene Amplification PCR  
96 System (BioRad Laboratories Inc.) with the following conditions: initial denaturation at 96°C for  
97 2 min, followed by 35 cycles of 94°C for 30s, 58°C for 40s and 72°C for 2 min, and a final  
98 extension at 72°C for 10 min. In addition to soil samples, a synthetic mock community (Nguyen  
99 *et al.*, 2015), DNA extraction blanks and PCR blanks were also amplified during library  
100 preparation. The amplicon libraries were produced from a pool of three separate PCRs per sample.  
101 The quality of PCR products was evaluated by agarose gel electrophoresis. The PCR product yield  
102 was quantified using the Quant-iT 1X dsDNA HS Assay kit (Life Technologies Inc., Gaithersburg,  
103 MD, USA) and samples were pooled at equimolar concentrations (50ng of each of the 378  
104 samples). Libraries were quality checked for correct amplicon size and purity using the Agilent  
105 2100 Bioanalyzer (Agilent Technologies, Santa Clara, CA, USA) at the Functional Genomics  
106 Laboratory at the University of California, Berkeley, CA. Sequencing was performed on the  
107 Illumina MiSeq platform (Illumina, San Diego, CA, USA) with 300bp paired-end reads at the  
108 Vincent J. Coates Genomics Sequencing Laboratory at the University of California, Berkeley, CA.  
109  
110

## 111 References

- 112  
113 **Berruti A, Desirò A, Visentin S, Zecca O, Bonfante P** 2017. ITS fungal barcoding primers  
114 versus 18S AMF-specific primers reveal similar AMF-based diversity patterns in roots and  
115 soils of three mountain vineyards. *Environmental Microbiology Reports* **9**: 658–667.
- 116 **Fadrosh DW, Ma B, Gajer P, Sengamalay N, Ott S, Brotman RM, Ravel J**, 2014. An  
117 improved dual-indexing approach for multiplexed 16S rRNA gene sequencing on the  
118 Illumina MiSeq platform. *Microbiome* **2**: 6.
- 119 **Gao C, Montoya L, Xu L, Madera M, Hollingsworth J, Purdom E, Hutmacher RB,**  
120 **Dahlberg JA, Coleman-Derr D, Lemaux PG, Taylor JW**, 2019. Strong succession in  
121 arbuscular mycorrhizal fungal communities. *The ISME Journal* **13**: 214–226.
- 122 **Lee J, Lee S, Young JP** 2008. Improved PCR primers for the detection and identification of  
123 arbuscular mycorrhizal fungi. *FEMS Microbiol Ecol* **65**: 339–349.
- 124 **Lekberg Y, Vasar M, Bullington LS, Sepp SK, Antunes PM, Bunn R, Larkin BG, Opik M**  
125 2018. More bang for the buck? Can arbuscular mycorrhizal fungal communities be  
126 characterized adequately alongside other fungi using general fungal primers. *New*  
127 *Phytologist* **220**: 971-976.
- 128 **Simon L, Lalonde M, Bruns TD** 1992. Specific amplification of 18S fungal ribosomal genes  
129 from vesicular-arbuscular endomycorrhizal fungi colonizing roots. *Applied and*  
130 *environmental microbiology* **58**: 291-295.

131 **Schoch CL, Seifert KA, Huhndorf S, Robert V, Spouge JL, Levesque CA, Chen W, Fungal**  
132 **BC, Fungal BCAL** 2012. Nuclear ribosomal internal transcribed spacer (ITS) region as a  
133 universal DNA barcode marker for Fungi. *Proc Natl Acad Sci U S A* **109**: 6241–6246.  
134 **Spatafora JW, Chang Y, Benny GL, Lazarus KL, Smith ME, Berbee ML, Bonito G,**  
135 **Corradi N, Grigoriev I, Gryganskyi A, et al.** 2016. A phylum-level phylogenetic  
136 classification of zygomycete fungi based on genome-scale data. *Mycologia* **108**: 1028–  
137 1046.  
138 **Stockinger H, Krüger M, Schüssler A** 2010. DNA barcoding of arbuscular mycorrhizal fungi.  
139 *New Phytologist* **187**: 461–474.  
140 **Taylor DL, Walters WA, Lennon NJ, Bochicchio J, Krohn A, Caporaso JG, Pennanen T,**  
141 2016. Accurate Estimation of Fungal Diversity and Abundance through Improved Lineage-  
142 Specific Primers Optimized for Illumina Amplicon Sequencing. *Applied and*  
143 *Environmental Microbiology* **82**: 7217–7226.  
144  
145  
146

147 **Figure S1.** PCA of soil properties used to calculate the soil properties index. The ordination plot  
148 is color-coded to illustrate differences in soil properties between farm management (monoculture  
149 versus polyculture) and transect type (within-rows versus across-rows).

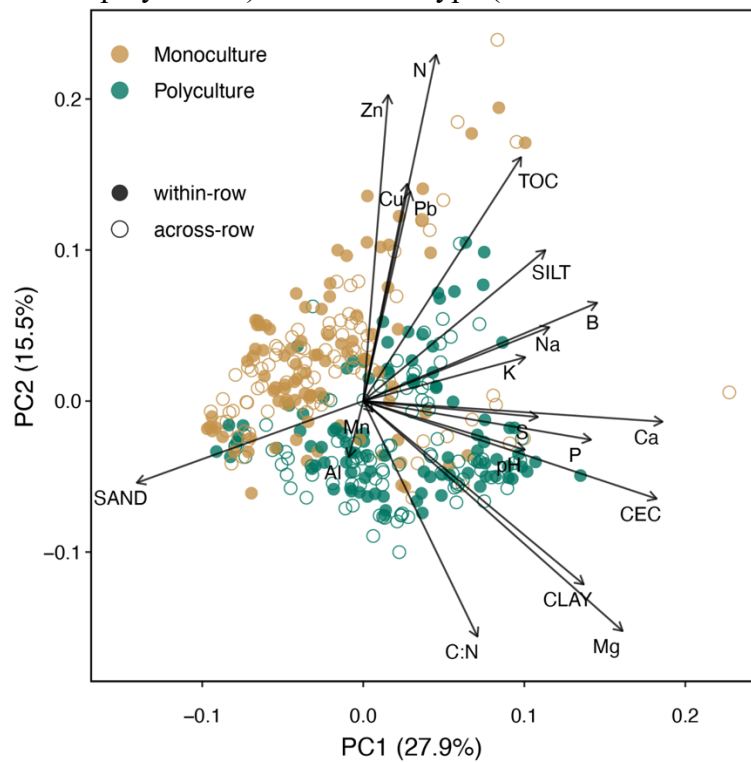

150  
151

152 **Figure S2.** The frequency of AMF taxa found in as few as 1 to as many as 100 of all 372  
153 communities sampled. Of the 243 AMF OTUs, 167 occurred in fewer than 10 samples.

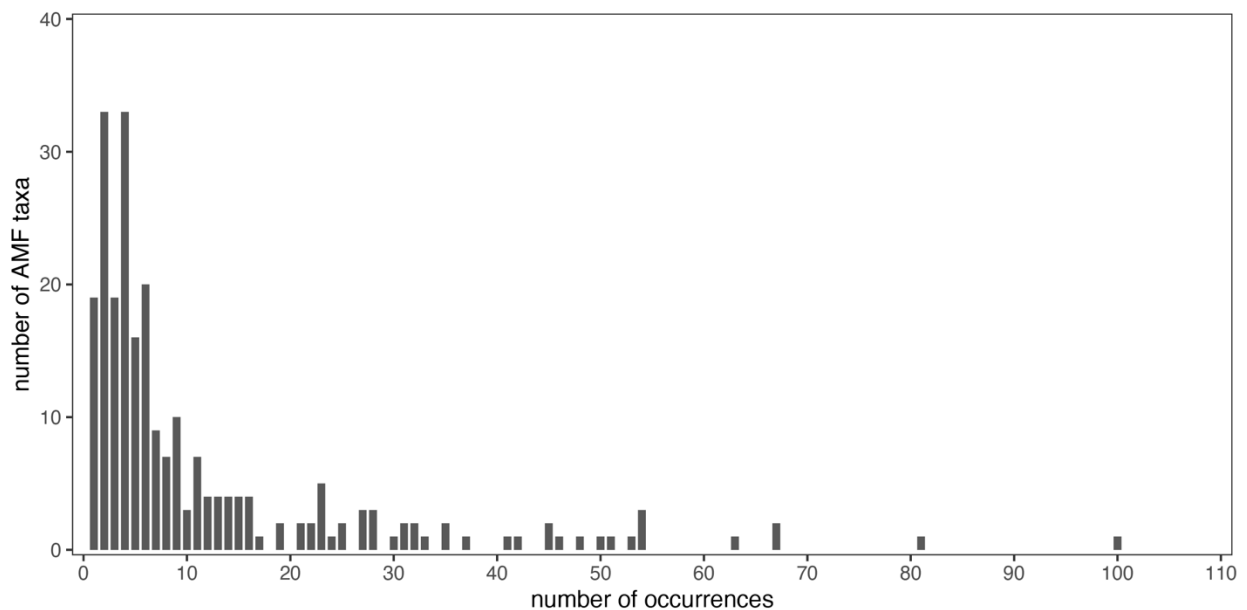

154  
155

156 **Figure S3.** The AMF taxa accumulation curve reaching a plateau of  $214.778 \pm 9.546$   
157 of 243 taxa after 167 samples.

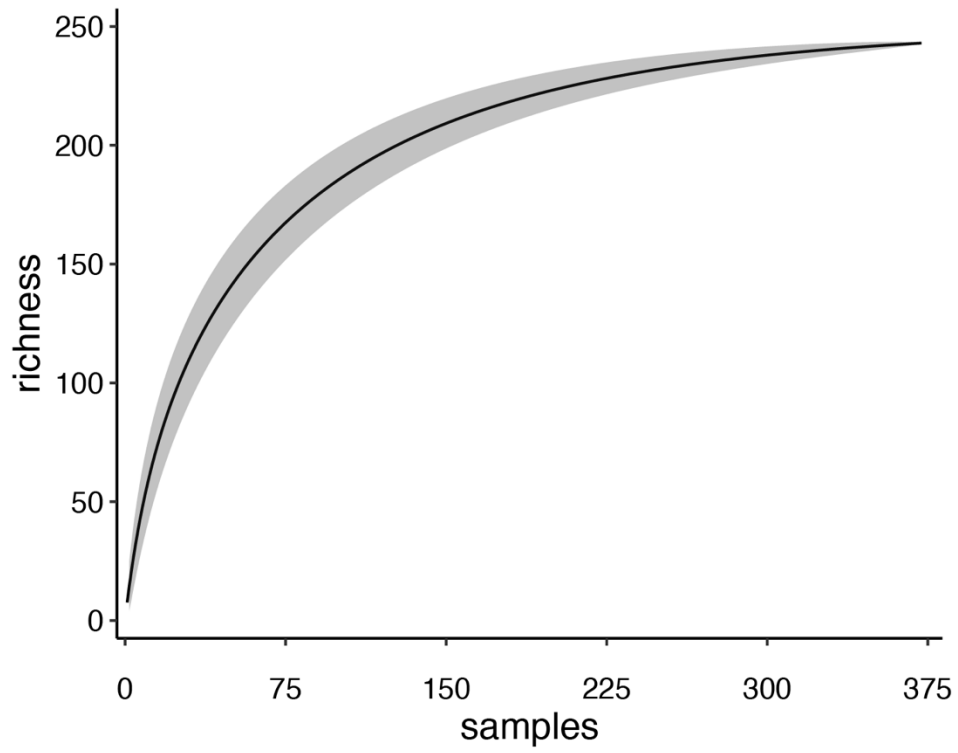

158  
159

160 **Figure S4.** Boxplot for observed richness for (a) between farm management (monoculture versus  
161 polyculture) and transect type (within-row versus across-row) plus (b) focal crop (eggplant  
162 versus squash). The boxplot is bounded by the first and third quartile ranges with the line in the  
163 box representing the median. The whiskers extend from the first and third quartile to values that  
164 are not within the 1.5 interquartile range from both directions. Data beyond the whiskers are  
165 presented as individual circles.  
166

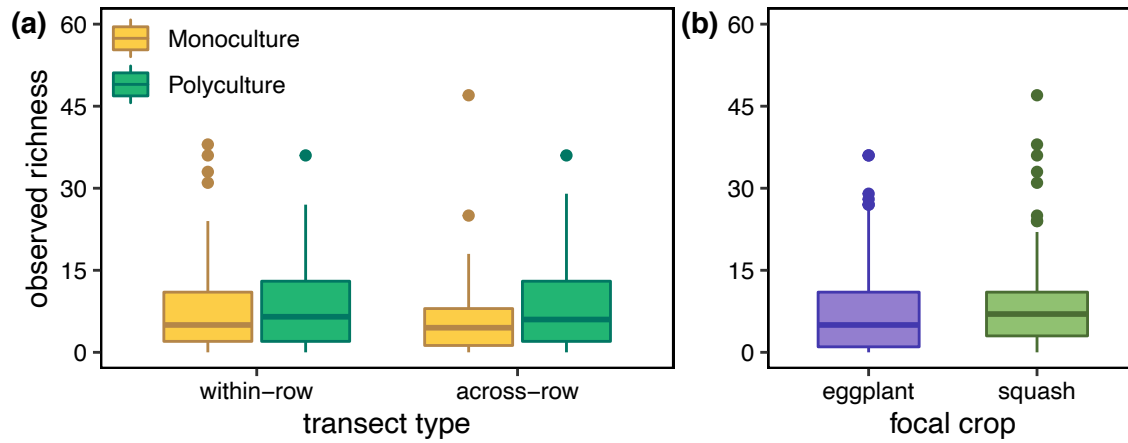

167  
168



169  
170  
171  
172  
173

**Figure S5.** The boxplot for AMF (a) observed richness, (b) chao1 richness, and (c) diversity across the number of years in polyculture management (0, <10, and >10 years).

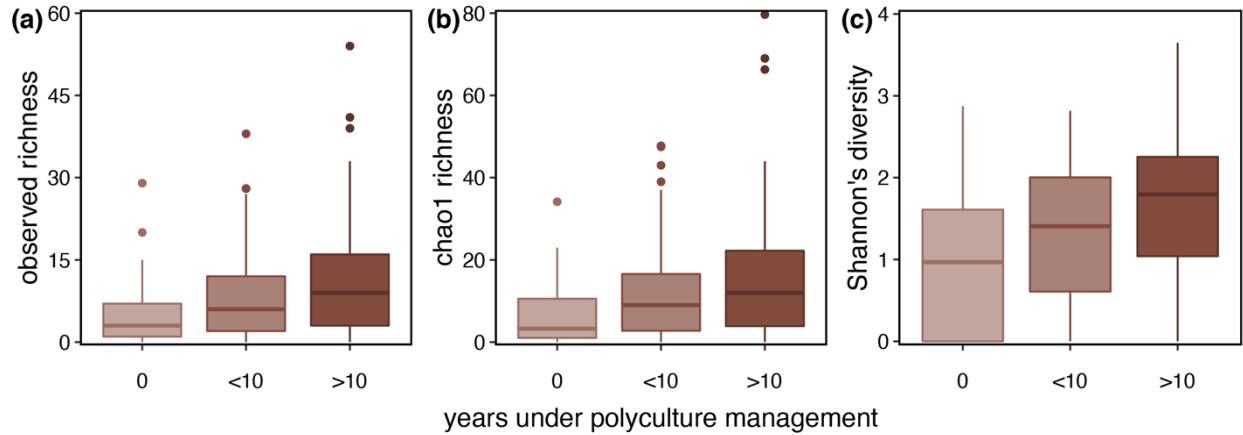

174  
175  
176  
177  
178

**Figure S6.** The boxplot for the dispersion of the edaphic property dissimilarities from the centroid between farm management (monoculture versus polyculture).

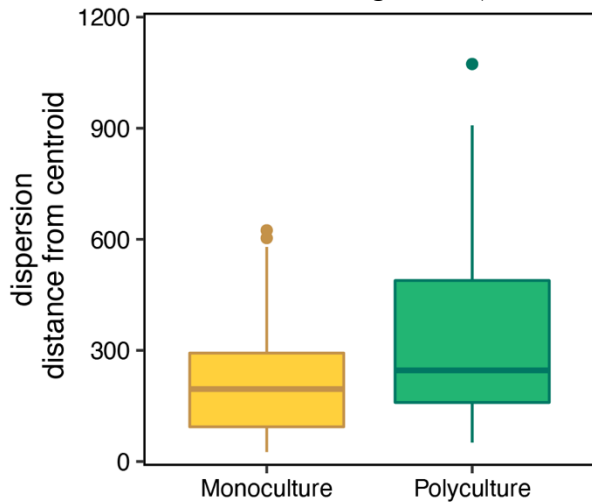

179  
180  
181

182 **Table S1.** Site properties, including farm management (monoculture versus polyculture), focal  
 183 crop (eggplant versus squash), plus field area (in acres), number of crops, and number of years in  
 184 polyculture, monoculture, or fallow.

| Sampling unit | Farm site | Year sampled | Farm management | Focal crop | Area (ac) | Number of crops | Total years of polyculture management | Total years of monoculture management | Total years of fallow |
|---------------|-----------|--------------|-----------------|------------|-----------|-----------------|---------------------------------------|---------------------------------------|-----------------------|
| 1             | A         | 2017         | Monoculture     | Eggplant   | 35.1      | 1               | 0                                     | 15                                    | 0                     |
| 2             | B         | 2017         | Monoculture     | Eggplant   | 35.2      | 1               | 10                                    | 5                                     | 0                     |
| 3             | C         | 2017         | Monoculture     | Eggplant   | 4.54      | 1               | 0                                     | 14                                    | 1                     |
| 4             | D         | 2017         | Monoculture     | Eggplant   | 6.13      | 1               | 0                                     | 2                                     | 13                    |
| 5             | E         | 2017         | Monoculture     | Eggplant   | 14.2      | 1               | 0                                     | 15                                    | 0                     |
| 6             | F         | 2017         | Polyculture     | Eggplant   | 3.901     | 31              | 13                                    | 2                                     | 0                     |
| 7             | G         | 2017         | Polyculture     | Eggplant   | 4.73      | 25              | 7                                     | 1                                     | 7                     |
| 8             | H         | 2017         | Polyculture     | Eggplant   | 11.4      | 46              | 7                                     | 8                                     | 0                     |
| 9             | I         | 2017         | Polyculture     | Eggplant   | 22.6      | NA              | 15                                    | 0                                     | 0                     |
| 10            | J         | 2017         | Polyculture     | Eggplant   | 28.7      | 29              | 15                                    | 0                                     | 0                     |
| 11            | C         | 2018         | Monoculture     | Eggplant   | 4.54      | 1               | 0                                     | 14                                    | 1                     |
| 12            | D         | 2018         | Monoculture     | Eggplant   | 6.13      | 1               | 0                                     | 3                                     | 12                    |
| 13            | K         | 2018         | Monoculture     | Eggplant   | 7.32      | 1               | 0                                     | 15                                    | 0                     |
| 14            | L         | 2018         | Monoculture     | Eggplant   | 20.9      | 1               | 0                                     | 15                                    | 0                     |
| 15            | M         | 2018         | Monoculture     | Eggplant   | 8.42      | 1               | 0                                     | 15                                    | 0                     |
| 16            | G         | 2018         | Polyculture     | Eggplant   | 4.73      | 25              | 8                                     | 0                                     | 7                     |
| 17            | H         | 2018         | Polyculture     | Eggplant   | 11.4      | 37              | 8                                     | 7                                     | 0                     |
| 18            | I         | 2018         | Polyculture     | Eggplant   | 22.6      | 66              | 15                                    | 0                                     | 0                     |
| 19            | J         | 2018         | Polyculture     | Eggplant   | 28.7      | 30              | 15                                    | 0                                     | 0                     |
| 20            | N         | 2018         | Polyculture     | Eggplant   | 8.86      | 30              | 11                                    | 1                                     | 3                     |
| 21            | O         | 2018         | Polyculture     | Eggplant   | 4.56      | 27              | 9                                     | 6                                     | 0                     |
| 22            | P         | 2018         | Monoculture     | Squash     | 15.75     | 1               | 0                                     | 10                                    | 5                     |
| 23            | Q         | 2018         | Monoculture     | Squash     | 36.9      | 1               | 0                                     | 15                                    | 0                     |
| 24            | R         | 2018         | Monoculture     | Squash     | 7.74      | 1               | 0                                     | 15                                    | 0                     |
| 25            | S         | 2018         | Monoculture     | Squash     | 24.9      | 1               | 0                                     | 5                                     | 10                    |
| 26            | T         | 2018         | Monoculture     | Squash     | 10.5      | 1               | 0                                     | 15                                    | 0                     |
| 27            | U         | 2018         | Polyculture     | Squash     | 4.34      | NA              | 8                                     | 0                                     | 7                     |
| 28            | V         | 2018         | Polyculture     | Squash     | 2.51      | NA              | 7                                     | 8                                     | 0                     |
| 29            | W         | 2018         | Polyculture     | Squash     | 13.6      | NA              | 7                                     | 8                                     | 0                     |
| 30            | X         | 2018         | Polyculture     | Squash     | 35.9      | NA              | 15                                    | 0                                     | 0                     |
| 31            | Y         | 2018         | Polyculture     | Squash     | 38.25     | 55              | 11                                    | 4                                     | 0                     |

Note: Data not available marked as "NA".

*\*Years under polyculture, monoculture, or fallow management in the 15 years prior to sampling*

185  
 186  
 187

188 **Table S2.** Results of the indicator species analysis for AMF taxa (listed by OTU plus their genus)  
 189 of monoculture and polyculture fields.

| Farm management          | OTU_Genus                | indval | P value |
|--------------------------|--------------------------|--------|---------|
| <b>Monoculture</b>       | OTU574_Rhizophagus       | 0.429  | 0.001   |
|                          | OTU222_Acaulospora       | 0.343  | 0.001   |
|                          | OTU299_Acaulospora       | 0.320  | 0.001   |
|                          | OTU2212_Diversispora     | 0.254  | 0.004   |
|                          | OTU817_Claroideoglossum  | 0.245  | 0.001   |
|                          | OTU2938_unassigned       | 0.236  | 0.002   |
|                          | OTU2107_unassigned       | 0.197  | 0.004   |
|                          | OTU1937_Claroideoglossum | 0.167  | 0.029   |
|                          | OTU2417_unassigned       | 0.167  | 0.023   |
| OTU2209_Claroideoglossum | 0.167                    | 0.032  |         |
| <b>Polyculture</b>       | OTU294_Glossum           | 0.552  | 0.001   |
|                          | OTU1132_unassigned       | 0.411  | 0.001   |
|                          | OTU759_unassigned        | 0.405  | 0.001   |
|                          | OTU857_Rhizophagus       | 0.377  | 0.001   |
|                          | OTU284_unassigned        | 0.375  | 0.001   |
|                          | OTU786_unassigned        | 0.367  | 0.001   |
|                          | OTU477_unassigned        | 0.348  | 0.001   |
|                          | OTU606_unassigned        | 0.348  | 0.001   |
|                          | OTU461_unassigned        | 0.347  | 0.001   |
|                          | OTU679_unassigned        | 0.346  | 0.001   |
|                          | OTU946_unassigned        | 0.325  | 0.001   |
|                          | OTU422_Rhizophagus       | 0.319  | 0.003   |
|                          | OTU751_unassigned        | 0.315  | 0.001   |
|                          | OTU605_unassigned        | 0.308  | 0.008   |
|                          | OTU1405_Paraglossum      | 0.289  | 0.001   |
|                          | OTU1041_unassigned       | 0.283  | 0.001   |
|                          | OTU793_Claroideoglossum  | 0.253  | 0.003   |
|                          | OTU419_unassigned        | 0.249  | 0.003   |
|                          | OTU1192_unassigned       | 0.244  | 0.003   |
|                          | OTU2112_unassigned       | 0.244  | 0.005   |
|                          | OTU617_unassigned        | 0.239  | 0.003   |
|                          | OTU1549_Diversispora     | 0.239  | 0.003   |
|                          | OTU2152_unassigned       | 0.239  | 0.002   |
|                          | OTU1269_unassigned       | 0.219  | 0.011   |
|                          | OTU789_Glossum           | 0.217  | 0.007   |
|                          | OTU1419_unassigned       | 0.217  | 0.007   |
|                          | OTU1297_Rhizophagus      | 0.217  | 0.004   |
|                          | OTU1487_Rhizophagus      | 0.217  | 0.007   |
|                          | OTU934_Glossum           | 0.204  | 0.008   |
|                          | OTU1464_Acaulospora      | 0.204  | 0.008   |
|                          | OTU1728_unassigned       | 0.204  | 0.007   |
|                          | OTU898_Glossum           | 0.201  | 0.029   |
|                          | OTU943_Glossum           | 0.198  | 0.05    |
|                          | OTU2717_unassigned       | 0.197  | 0.041   |
|                          | OTU1548_unassigned       | 0.196  | 0.039   |
|                          | OTU820_Dominikia         | 0.194  | 0.027   |
| OTU1359_Claroideoglossum | 0.191                    | 0.015  |         |
| OTU1049_unassigned       | 0.191                    | 0.016  |         |
| OTU1131_unassigned       | 0.191                    | 0.013  |         |
| OTU2158_Diversispora     | 0.191                    | 0.017  |         |
| OTU1954_Glossum          | 0.187                    | 0.04   |         |
| OTU907_Glossum           | 0.177                    | 0.029  |         |
| OTU1241_unassigned       | 0.177                    | 0.038  |         |
| OTU1455_Glossum          | 0.177                    | 0.042  |         |
| OTU2460_unassigned       | 0.177                    | 0.043  |         |
| OTU2913_unassigned       | 0.177                    | 0.035  |         |
| OTU1908_Claroideoglossum | 0.161                    | 0.048  |         |

191 **Table S3.** Model parameter estimates, with standard error in parentheses, of all soil properties.  
 192

| <b>Edaphic variable</b> | <b>Farm type</b>     | <b>Transect type</b> | <b>Focal crop</b> | <b>Farm management x Transect Type</b> |
|-------------------------|----------------------|----------------------|-------------------|----------------------------------------|
| Al                      | - 0.253(0.458)       | 0.016(0.065)         | 0.638(0.49)       | - 0.040(0.065)                         |
| B                       | - 0.016(0.026)       | 0.001(0.006)         | 0.012(0.028)      | - 0.005(0.006)                         |
| C:N                     | - 1.240(0.534) *     | - 0.469(0.105) ***   | 0.487(0.571)      | 0.232(0.105) *                         |
| Ca                      | - 97.562(57.601)     | - 14.441(9.538)      | 13.787(61.578)    | - 12.093(9.538)                        |
| CEC                     | - 1.092(0.383) **    | - 0.047(0.057)       | 0.469(0.409)      | - 0.096(0.057)                         |
| % clay                  | - 1.866(0.427) ***   | - 0.102(0.088)       | 0.496(0.456)      | 0.040(0.088)                           |
| Cu                      | 0.058(0.07)          | 0.008(0.014)         | 0.093(0.075)      | - 0.012(0.014)                         |
| K                       | - 20.121(8.644) *    | 5.270(2.388) *       | 10.767(9.241)     | - 5.074(2.388) *                       |
| Mg                      | - 77.962(17.616) *** | - 1.734(1.246)       | 24.493(18.832)    | - 0.974(1.246)                         |
| Mn                      | - 0.88(0.772)        | 0.399(0.206)         | 1.512(0.826)      | - 0.479(0.206) *                       |
| N                       | 0.003(0.003)         | 0.002(0.001) **      | 0.001(0.003)      | - 0.001(0.001)                         |
| Na                      | - 4.178(3.694)       | 1.309(0.838)         | - 3.097(3.949)    | - 1.748(0.838) *                       |
| P                       | - 6.477(3.214)       | 0.996(0.635)         | 3.329(3.436)      | - 2.238(0.635) ***                     |
| Pb                      | 0.069(0.028) *       | 0.014(0.009)         | 0.019(0.03)       | 0.004(0.009)                           |
| pH                      | - 0.155(0.146)       | - 0.015(0.018)       | - 0.009(0.156)    | 0.009(0.018)                           |
| S                       | - 5.681(1.84) **     | 0.815(0.801)         | 0.677(1.967)      | - 2.113(0.801) **                      |
| % sand                  | 0.944(2.017)         | 0.515(0.251) *       | 0.629(2.157)      | 0.232(0.251)                           |
| % silt                  | 0.922(1.737)         | - 0.413(0.258)       | - 1.125(1.857)    | - 0.271(0.258)                         |
| TOC                     | - 0.006(0.027)       | 0.005(0.005)         | 0.014(0.029)      | - 0.006(0.005)                         |
| Zn                      | 1.170(0.366) **      | 0.028(0.056)         | 0.849(0.392) *    | - 0.071(0.056)                         |

\*  $P < 0.01$ , \*\*  $P < 0.05$ , \*\*\*  $P < 0.001$ ; Al, aluminum; B, boron; C:N, carbon-nitrogen ratio; Ca, calcium; CEC, cation exchange capacity; Cu, copper; K, potassium; Mg, magnesium; Mn, manganese; N, nitrogen; Na, sodium; P, phosphorus; Pb, lead; S, sulfur; TOC, total organic carbon; Zn, zinc.

193  
 194
